# Supplementary material for: Improving Estuarine Flood Risk Knowledge through Documentary Data Using Multiple Correspondence Analysis
Source: MDPI journal article supplement (doi:10.3390/w14193161), 2022-10-07
Supplement: s1 [file s1]

Archive with 1 entries (1 files):
- water-1899715-supplementary.pdf
