# Supplementary material for: Improving Estuarine Flood Risk Knowledge through Documentary Data Using Multiple Correspondence Analysis
Source: MDPI journal article supplement (doi:10.3390/w14193161), 2022-10-07
Supplement: s1 [file s1 › water-1899715-supplementary.pdf]

## Supplementary File

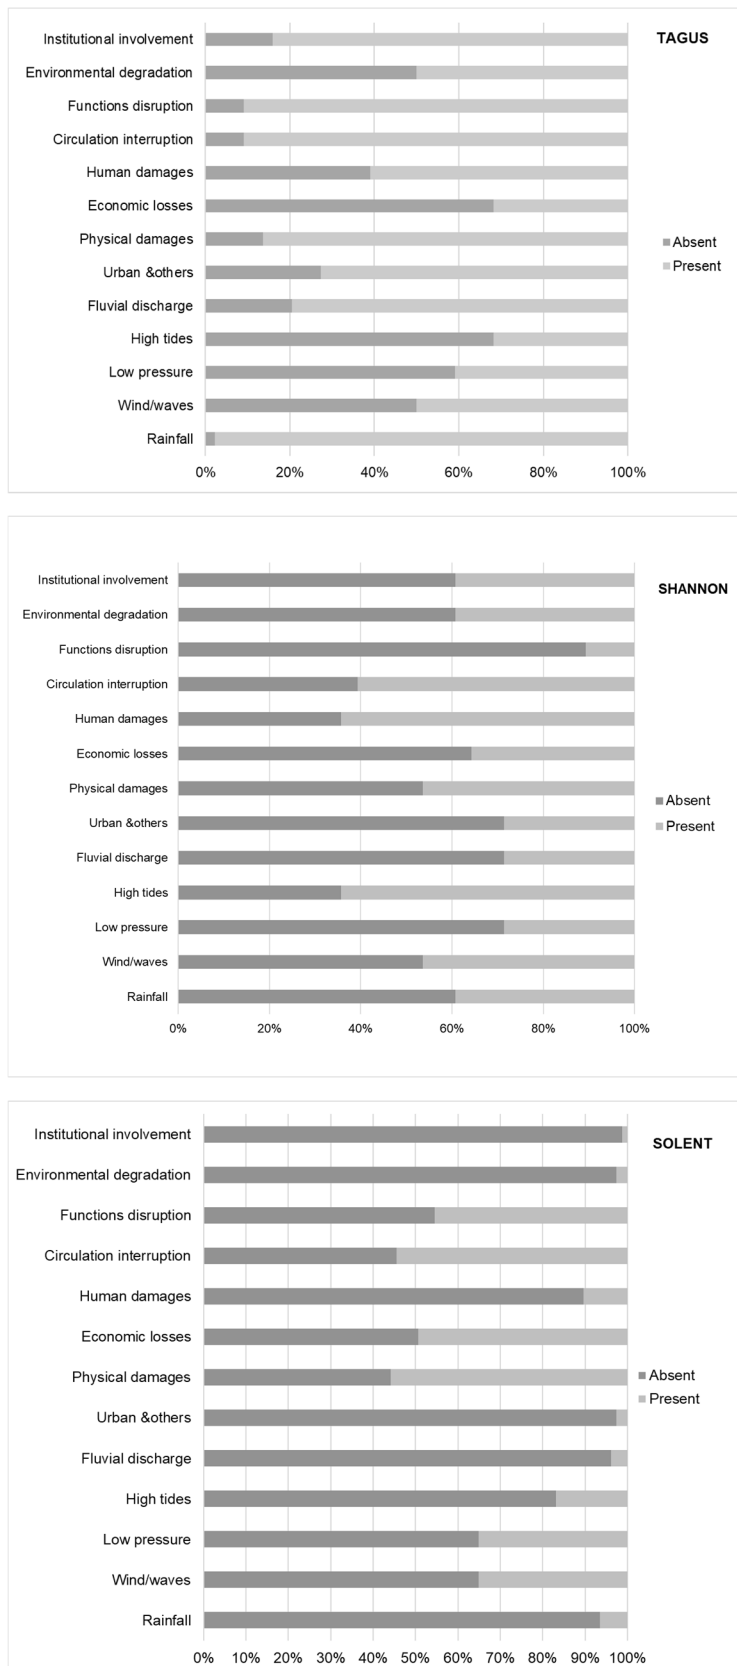

**Figure S1** Reported presence and absence of all considered variables before MCA application for each estuarine system. Tagus comprises 44 events, Shannon comprises 28 and Solent comprises 77. Overall, the total number of events are 149.
